# Supplementary material for: Enhanced Z-schematic water splitting using a (CuGa)0.5ZnS2 H2-evolving photocatalyst with treatment in aqueous solutions
Source: Royal Society of Chemistry journal article supplement (doi:10.1039/d3cc03234e), 2023-01-01
Supplement: d3cc03234e1.pdf [file d3cc03234e1.pdf]

## Supporting information

### Enhanced Z-schematic water splitting using $(\text{CuGa})_{0.5}\text{ZnS}_2$ $\text{H}_2$ -evolving photocatalyst with a post-treatment in aqueous solutions

Akihide Iwase, Koki Yagishita

#### Experimental

##### Synthesis of photocatalysts

$(\text{CuGa})_{0.5}\text{ZnS}_2$  was synthesized by a solid-state reaction, as previously reported.<sup>1</sup> Starting materials of  $\text{Cu}_2\text{S}$  (Kojundo Chemical, 99%),  $\text{Ga}_2\text{S}_3$  (Kojundo Chemical, 99.99%), and  $\text{ZnS}$  (Rare Metal Chemical, 99.99%) in an atomic ratio of  $\text{Cu/Ga/Zn}=1:1.2:2.4$  were mixed in an agate mortar. The mixed starting materials were encapsulated in a quartz tube after evacuation and was subsequently calcined at 1073 K for 10h. The obtained  $(\text{CuGa})_{0.5}\text{ZnS}_2$  powder (0.11 g) was stirred at room temperature for 10 minutes in 20 mL of water, an aqueous  $\text{NaOH}$  solution ( $1.0 \text{ mol L}^{-1}$ ), and aqueous  $\text{Na}_2\text{S}$  solutions ( $1.0, 2.0 \text{ mol L}^{-1}$ ) for surface treatments.

$\text{BiVO}_4$  was synthesized from  $\text{Bi}_2\text{O}_3$  (Kanto Chemical, 99.9%) and  $\text{V}_2\text{O}_5$  (Kanto Chemical, 99.0%) by a liquid-solid-state reaction, as previously reported.<sup>2</sup>  $\text{Bi}_2\text{O}_3$  (5 mmol) and  $\text{V}_2\text{O}_5$  (5 mmol) were vigorously stirred in a  $1.0 \text{ mol L}^{-1}$  aqueous  $\text{HNO}_3$  solution (50 mL) at room temperature for 48 hours. A  $\text{CoO}_x$  cocatalyst was loaded on the obtained  $\text{BiVO}_4$  by an impregnation method.<sup>3</sup> The  $\text{BiVO}_4$  powder (0.5 g) and  $80 \text{ mmol L}^{-1}$  aqueous  $\text{Co}(\text{NO}_3)_2$  solution (0.53 mL) were placed in a porcelain crucible and dried. The impregnated powder was calcined at 673 K for 2 h in the air to obtain  $\text{CoO}_x(0.5 \text{ wt}\%)\text{-loaded BiVO}_4$  ( $\text{CoO}_x/\text{BiVO}_4$ ). An RGO-incorporated  $\text{CoO}_x/\text{BiVO}_4$  ( $\text{RGO-CoO}_x/\text{BiVO}_4$ ) was prepared by photocatalytic reduction of a graphene oxide (NiSiNa materials, Rap eGO) over  $\text{CoO}_x/\text{BiVO}_4$  under visible light irradiation.<sup>3</sup> A graphene oxide (GO)-dispersed solution ( $10 \text{ mg mL}^{-1}$ , 1.5 mL),  $\text{CoO}_x/\text{BiVO}_4$  (0.3 g), and methanol (20 mL) were added into water (20 mL). The suspension was irradiated with visible light using a 300 W Xe lamp (LuxteL, CeraLux CL-300BF) with a long-pass filter (HOYA, L42) for 3 hours in an atmosphere of  $\text{N}_2$ .

##### Characterization

The crystal phases of the synthesized  $(\text{CuGa})_{0.5}\text{ZnS}_2$  and  $\text{BiVO}_4$  were analyzed on an X-ray diffractometer (Rigaku, MiniFlex). Diffuse reflectance spectra were obtained

using a UV-vis-NIR spectrometer (JASCO, V-650) equipped with an integrating sphere and were converted from reflection to K-M function by the Kubelka-Munk method. Morphology and particle size of the photocatalyst powder were observed using a scanning electron microscope (Hitachi, S-5200).

### Photocatalytic reactions

Z-schematic water splitting was carried out under 1 atm of Ar gas flow. (CuGa)<sub>0.5</sub>ZnS<sub>2</sub> (0.05 g) and RGO-CoO<sub>x</sub>/BiVO<sub>4</sub> (0.05 g) were dispersed in water (120 mL) in a top-irradiation cell with a Pyrex window. Sacrificial H<sub>2</sub> evolution was carried out using a gas-tight circulation system. (CuGa)<sub>0.5</sub>ZnS<sub>2</sub> (0.2 g) was dispersed in an aqueous solution (120 mL) containing Na<sub>2</sub>S (0.1 mol L<sup>-1</sup>) and K<sub>2</sub>SO<sub>3</sub> (0.5 mol L<sup>-1</sup>). A 300 W Xe arc lamp with a long-pass filter (HOYA, L42) was used as a light source for visible light irradiation. The amounts of evolved gases were determined using an online gas chromatograph (Shimadzu, GC-8A, TCD detector, MS-5A column, Ar carrier).

### References

1. T. Kato, Y. Hakari, S. Ikeda, Q. Jia, A. Iwase and A. Kudo, *J. Phys. Chem. Lett.*, 2015, **6**, 1042-1047.
2. A. Iwase, H. Kato, A. Kudo, *J. Sol. Energy Eng.*, 2010, **132**, 21106.
3. A. Iwase, S. Yoshino, T. Takayama, Y. H. Ng, R. Amal and A. Kudo, *J. Am. Chem. Soc.*, 2016, **138**, 10260-10264.

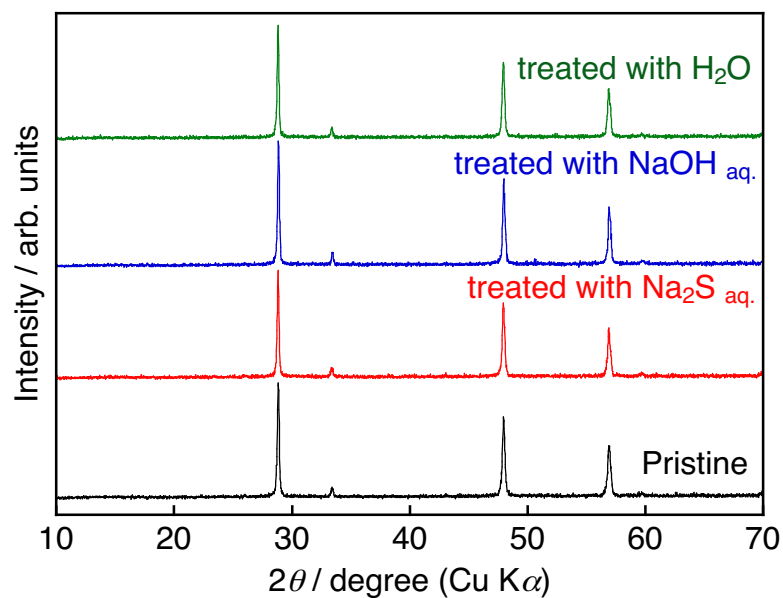

**Figure S1** XRD patterns of pristine  $(\text{CuGa})_{0.5}\text{ZnS}_2$  (black) and  $(\text{CuGa})_{0.5}\text{ZnS}_2$  treated in a  $2.0 \text{ mol L}^{-1}$  aqueous  $\text{Na}_2\text{S}$  solution (red), a  $1.0 \text{ mol L}^{-1}$  aqueous  $\text{NaOH}$  solution (blue), and water (green).

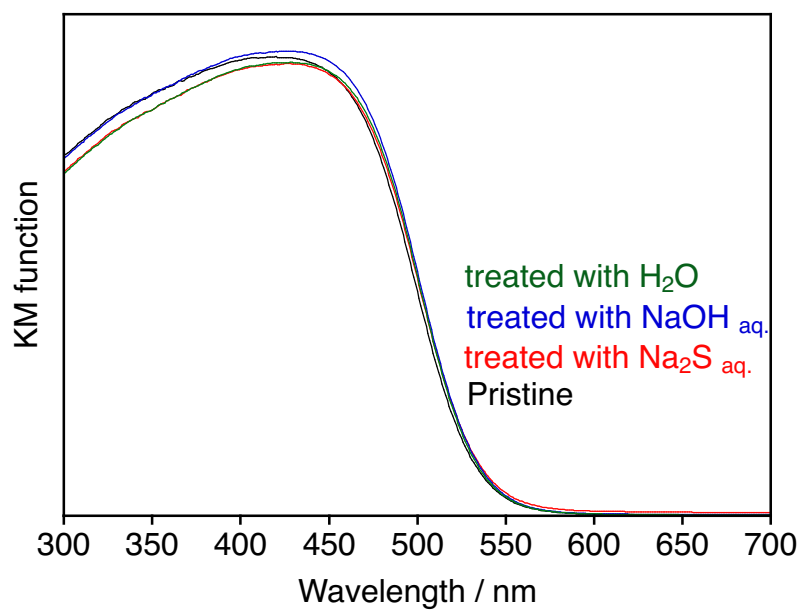

**Figure S2** Diffuse reflectance spectra of pristine  $(\text{CuGa})_{0.5}\text{ZnS}_2$  (black) and  $(\text{CuGa})_{0.5}\text{ZnS}_2$  treated in a  $2.0 \text{ mol L}^{-1}$  aqueous  $\text{Na}_2\text{S}$  solution (red), a  $1.0 \text{ mol L}^{-1}$  aqueous  $\text{NaOH}$  solution (blue), and water (green).

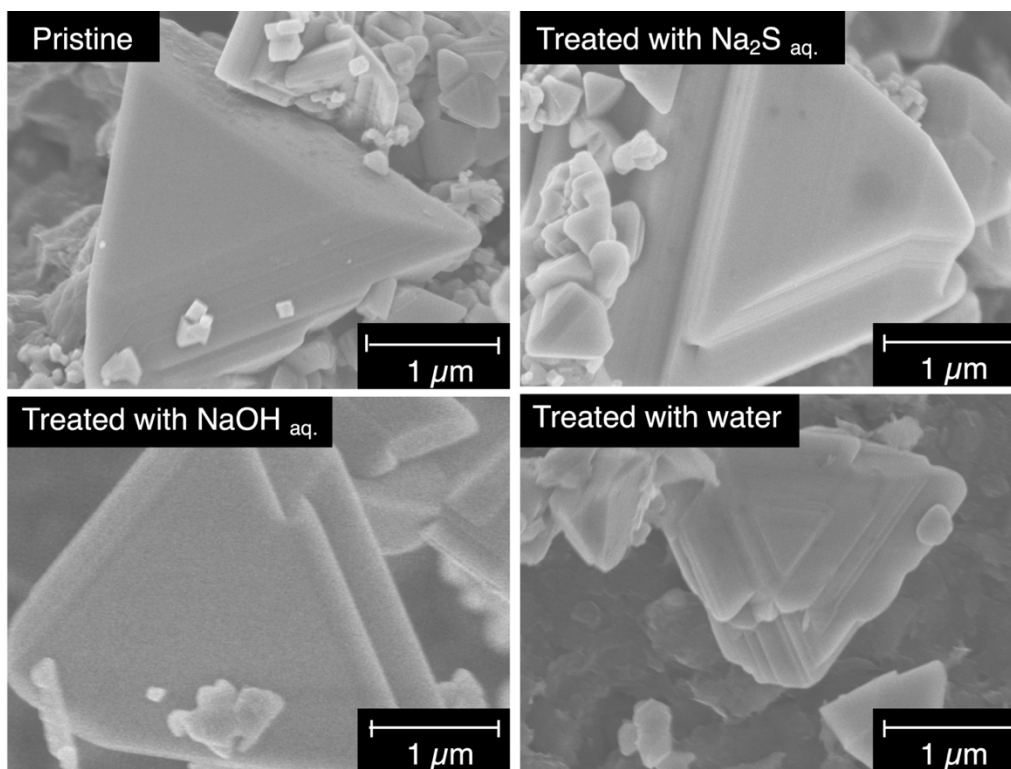

**Figure S3** SEM images of pristine  $(\text{CuGa})_{0.5}\text{ZnS}_2$  and  $(\text{CuGa})_{0.5}\text{ZnS}_2$  treated in a  $2.0 \text{ mol L}^{-1}$  aqueous  $\text{Na}_2\text{S}$  solution, a  $1.0 \text{ mol L}^{-1}$  aqueous  $\text{NaOH}$  solution, and water.

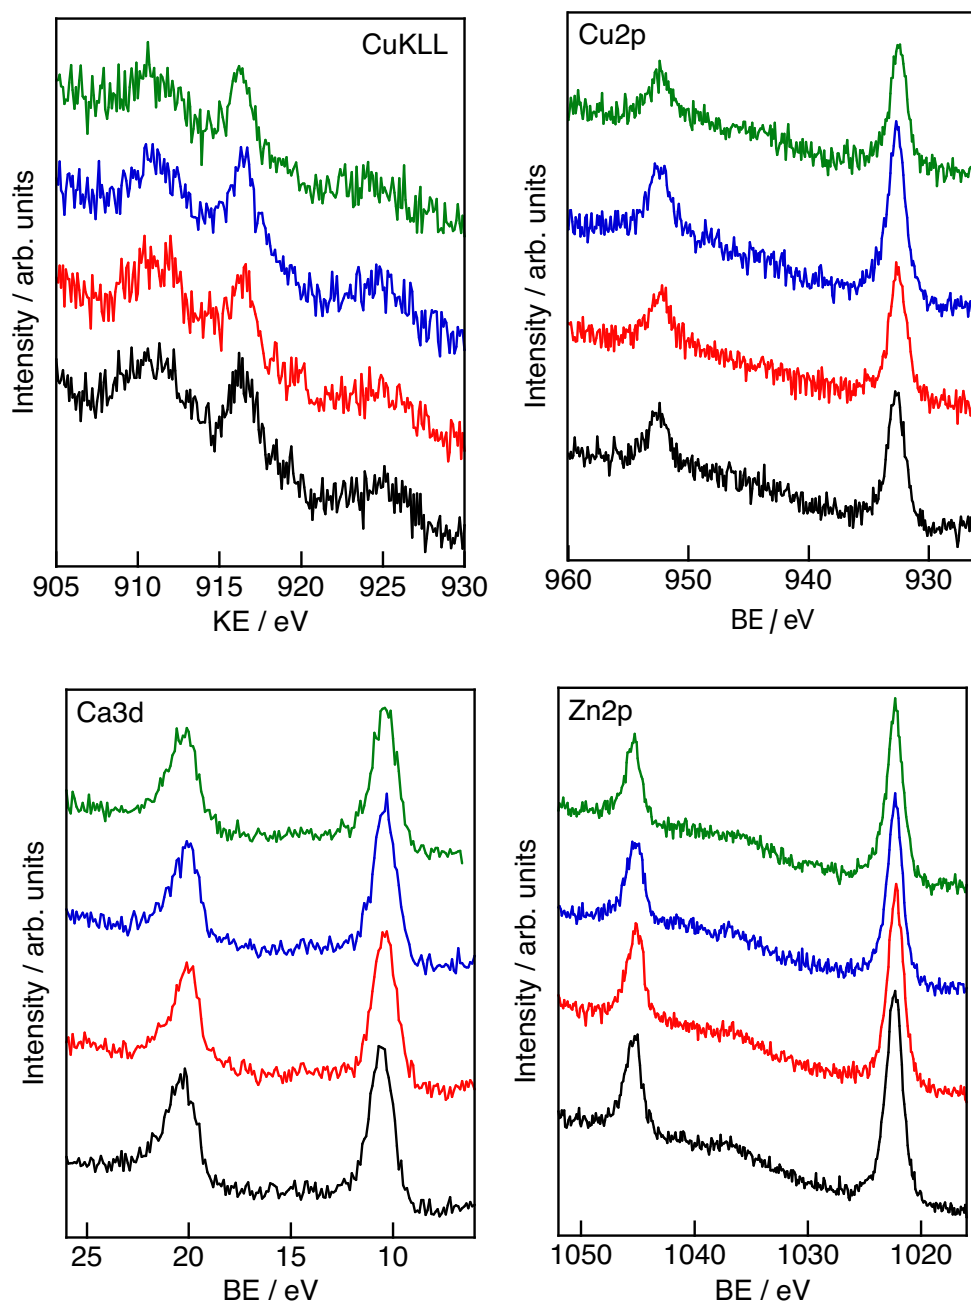

**Figure S4** Auger spectra for Cu  $\text{L}_{3}\text{M}_{4,5}\text{M}_{4,5}$  and X-ray photoelectron spectra for Cu2p, Ga3d, and Zn2p in pristine  $(\text{CuGa})_{0.5}\text{ZnS}_2$  (black) and  $(\text{CuGa})_{0.5}\text{ZnS}_2$  treated in a 2.0 mol  $\text{L}^{-1}$  aqueous  $\text{Na}_2\text{S}$  solution (red), a 1.0 mol  $\text{L}^{-1}$  aqueous  $\text{NaOH}$  solution (blue), and water (green).

**Table S1** Atomic ratio at the surface estimated by XPS of  $(\text{CuGa})_{0.5}\text{ZnS}_2$  with and without a treatment in aqueous solutions

| Treatment                                                | Atomic ratio |       |      |
|----------------------------------------------------------|--------------|-------|------|
|                                                          | Ga/Cu        | Zn/Cu | S/Cu |
| –                                                        | 0.24         | 3.47  | 0.51 |
| 2.0 mol L <sup>-1</sup> Na <sub>2</sub> S <sub>aq.</sub> | 0.23         | 2.87  | 0.42 |
| 1.0 mol L <sup>-1</sup> NaOH <sub>aq.</sub>              | 0.17         | 2.05  | 0.33 |
